# Supplementary material
Source: MDPI journal article supplement (https://www.mdpi.com/2073-4441/13/3/367)
Supplement: s1 [file s1]

## **Background Information**

The following questions ask you about your role as an expert.

1. What organization or agency do you work for?
2. What is your position/title at this organization or agency?
3. What city do you work in?
4. List the kinds of tasks you work on in your position. For example, analytical technical tasks, field site tasks, administrative, etc..
5. How many years of experience do you have in this career?
6. What is your gender?
7. What is your age?

## **Water Reservoir Parameters**

Five technical parameters relevant to the construction and operation of a floodwater reservoir are being considered to help build our site suitability decision model. This is a preliminary model that will be expanded upon in the future.

For this study, a floodwater reservoir is an artificial wetland/lake constructed to retain water for long term water supply. This reservoir would be fed by floodwater and precipitation run-off. The Barays at Angkor are examples of traditional floodwater water reservoirs in Cambodia. We would like to determine sites for similar multi-use floodwater reservoirs. These reservoirs could provide many benefits such as water retention during drought periods, groundwater recharge, promoting biodiversity, increased fish production, recreation, and tourism.

The five survey parameters considered for our site model are as follows:

**Geologic Porosity** – A measurement of how much void space is in the rock formations below the soil

**Slope Gradient** – A measurement of how quickly the land changes elevation

**Soil Drainage** – A measurement of how quickly water drains through the topsoil

**Annual Precipitation** – measurement of how much rainfall an area receives yearly

**Land Use** – A description of how the land is covered in an area (farm use, forest, etc.)

The following table asks you to *rank how important the five parameters are when compared to one another*. For example, you will be asked to *compare how important geologic porosity is in comparison to soil drainage*.
